# Supplementary material for: Small Molecule Agonists of PPAR-γ Exert Therapeutic Effects in Esophageal Cancer
Source: Oxford University Press journal article supplement (doi:10.1158/0008-5472.can-13-1836), 2013-11-22
Supplement: 00085472can131836-sup-tab2.pdf [file 00085472can131836-sup-tab2.pdf]

**Supplementary Table S2.** PPAR $\gamma$  status in ESCC and patient mortality.

| Factors                 | n   | Disease-free survival                                 |                                     | Cancer-specific survival            |                                     |
|-------------------------|-----|-------------------------------------------------------|-------------------------------------|-------------------------------------|-------------------------------------|
|                         |     | Univariate<br>HR <sup>*1</sup> (95%CI <sup>*2</sup> ) | Multivariate<br>HR (95%CI)          | Univariate<br>HR (95%CI)            | Multivariate<br>HR (95%CI)          |
| PPAR $\gamma$ -negative | 109 | 1 (Reference)                                         | 1 (Reference)                       | 1 (Reference)                       | 1 (Reference)                       |
| PPAR $\gamma$ -positive | 36  | 0.408<br>(0.173 – 0.967)<br>P=0.042                   | 0.389<br>(0.161 – 0.940)<br>P=0.036 | 0.338<br>(0.119 – 0.961)<br>P=0.042 | 0.339<br>(0.117 – 0.983)<br>P=0.046 |

The statistically correlation between all pairs of the patients background was checked and a strong correlation (Spearman's rank correlation coefficients  $\rho=0.847$  was observed between the pN and TMN classification and the other pairs were not observed a strong correlation ( $\rho>0.700$ ). We performed multivariate Cox regression analysis to compute a HR according to male sex, age $\geq 65$ , location (Ce, Ut or Mt), pT (pT3), the present of lymph node metastasis, lymphatic invasion and vascular invasion. Backward stepwise regression (likelihoods methods) with a threshold of  $P=0.20$  was used to select variables in the final model. Ce; Cervical esophagus, Ut; upper thoracic esophagus, Mt; middle thoracic esophagus.

\*<sup>1</sup> Hazard ratio, \*<sup>2</sup> Confidence interval.
